# Supplementary material for: Enhancing high-resolution forest stand mean height mapping in China through an individual tree-based approach with close-range lidar data
Source: Copernicus journal article supplement (doi:10.5194/essd-16-5267-2024), 2024-11-14
Supplement: Supplementary file 1 [file essd-16-5267-2024-supplement.pdf]

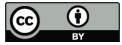

*Supplement of*

## **Enhancing high-resolution forest stand mean height mapping in China through an individual tree-based approach with close-range lidar data**

**Yuling Chen et al.**

*Correspondence to:* Qinghua Guo ([guo.qinghua@pku.edu.cn](mailto:guo.qinghua@pku.edu.cn))

The copyright of individual parts of the supplement might differ from the article licence.

22 **Supplementary data**

23 **Table S1.** The mathematic formulas of the stand mean height growth equations.

| NO. | Model             | Equation                             |
|-----|-------------------|--------------------------------------|
| 1   | Logistic,1838     | $H = \frac{A}{1 + m \times e^{-rt}}$ |
| 2   | Mitscherlich,1850 | $H = A \times (1 - e^{-rt})$         |
| 3   | Gompertz,1825     | $H = A \times e^{-m \times e^{-rt}}$ |
| 4   | Korf,1939         | $H = A \times e^{-m \times t^{-r}}$  |
| 5   | Richards,1959     | $H = A \times (1 - e^{-rt})^m$       |
| 6   | Schumacher, 1939  | $H = A \times e^{-r/t}$              |

24 Notes:  $H$  is the forest stand height (m),  $t$  is the forest age (years), and  $A$ ,  $m$ , and  $r$  ( $r >$   
 25  $0$ ) are the model parameters.  $A$  is maximum growth parameter,  $m$  is the parameter  
 26 related to the initial value,  $r$  is the growth rate parameter.

27 **Table S2.** The fitting results of stand weighted mean height growth model

| NO. | Parameter estimation |       |        | RMSE | R2   |
|-----|----------------------|-------|--------|------|------|
|     | A                    | m     | r      |      |      |
| 1   | 15.937               | 6.057 | 0.101  | 4.4  | 0.48 |
| 2   | 16.762               | ---   | 0.043  | 4.5  | 0.46 |
| 3   | 16.182               | 2.320 | 0.071  | 4.5  | 0.47 |
| 4   | 1258.080             | 6.656 | 0.096  | 4.9  | 0.37 |
| 5   | 16.346               | 1.294 | 0.054  | 4.5  | 0.46 |
| 6   | 18.748               | ---   | 12.734 | 4.6  | 0.43 |

29 **Table S3.** Test results for stand weighted mean height growth model

| <b>NO.</b> | <b>ME</b>  | <b>MAE</b> | <b>RMSE</b> |
|------------|------------|------------|-------------|
| <b>1</b>   | <b>0.1</b> | <b>3.5</b> | <b>4.4</b>  |
| 2          | 0.0        | 3.6        | 4.5         |
| 3          | 0.1        | 3.6        | 4.4         |
| 4          | 0.8        | 3.8        | 4.9         |
| 5          | 0.1        | 3.6        | 4.5         |
| 6          | 0.2        | 3.7        | 4.6         |

31 **Table S4.** Comparison of deviations between weighted mean heights with different  
32 weights ( $w_1$  and  $w_2$ ) and Lorey's mean height (national forest inventory data)

| <b>Weight</b> | <b>ME</b> | <b>MAE</b> | <b>RMSE</b> |
|---------------|-----------|------------|-------------|
| $w_1$         | -0.0197   | 1.8069     | 2.4178      |
| $w_2$         | -0.0072   | 1.8056     | 2.4174      |

33

**Table S5.** Model selection results based on *PyCaret*

| Model | ID              | Algorithm                       | MAE     | MSE     | RMSE    | R2     | RMSLE  | MAPE   | TT (Sec) |
|-------|-----------------|---------------------------------|---------|---------|---------|--------|--------|--------|----------|
| $h_a$ | et              | Extra Trees Regressor           | 1.6919  | 5.6881  | 2.3849  | 0.8456 | 0.2304 | 0.2094 | 36.987   |
|       | rf              | Random Forest Regressor         | 1.8013  | 6.2508  | 2.5001  | 0.8303 | 0.2426 | 0.2256 | 149.23   |
|       | xgboost         | Extreme Gradient Boosting       | 2.4366  | 10.4521 | 3.2329  | 0.7162 | 0.3096 | 0.3106 | 2.3      |
|       | catboost        | CatBoost Regressor              | 2.5239  | 11.2227 | 3.35    | 0.6953 | 0.318  | 0.3214 | 5.143    |
|       | lightgbm        | Light Gradient Boosting Machine | 2.6471  | 12.1383 | 3.484   | 0.6705 | 0.3304 | 0.3395 | 2.491    |
|       | dt              | Decision Tree Regressor         | 2.3943  | 12.1877 | 3.491   | 0.6691 | 0.331  | 0.2861 | 14.082   |
|       | knn             | K Neighbors Regressor           | 2.6074  | 12.6528 | 3.557   | 0.6565 | 0.3361 | 0.3308 | 8.528    |
|       | gbr             | Gradient Boosting Regressor     | 2.9095  | 14.6332 | 3.8253  | 0.6027 | 0.3552 | 0.3736 | 434.882  |
|       | ridge           | Ridge Regression                | 3.2646  | 18.7622 | 4.3315  | 0.4907 | 0.3881 | 0.4112 | 0.851    |
|       | lr              | Linear Regression               | 3.2648  | 18.7634 | 4.3316  | 0.4906 | 0.388  | 0.4112 | 1.018    |
|       | en              | Elastic Net                     | 3.5316  | 21.9934 | 4.6897  | 0.403  | 0.4076 | 0.444  | 6.587    |
|       | lasso           | Lasso Regression                | 3.5516  | 22.2246 | 4.7142  | 0.3967 | 0.4101 | 0.4479 | 3.508    |
|       | llar            | Lasso Least Angle Regression    | 3.5515  | 22.2239 | 4.7142  | 0.3967 | 0.4101 | 0.4478 | 0.483    |
|       | ada             | AdaBoost Regressor              | 3.7989  | 22.4426 | 4.7318  | 0.3906 | 0.4513 | 0.5552 | 58.039   |
|       | huber           | Huber Regressor                 | 3.5113  | 23.2    | 4.8164  | 0.3702 | 0.4037 | 0.4099 | 19.96    |
|       | omp             | Orthogonal Matching Pursuit     | 3.7264  | 24.1636 | 4.9156  | 0.344  | 0.4306 | 0.4726 | 0.478    |
| dummy | Dummy Regressor | 4.8126                          | 36.8399 | 6.0695  | -0.0001 | 0.5225 | 0.6262 | 0.579  |          |

| Model | ID       | Algorithm                       | MAE    | MSE      | RMSE   | R2      | RMSLE  | MAPE   | TT (Sec) |
|-------|----------|---------------------------------|--------|----------|--------|---------|--------|--------|----------|
| $h_w$ | par      | Passive Aggressive Regressor    | 7.7406 | 101.2993 | 8.9423 | -1.7571 | 0.6511 | 1.0584 | 2.015    |
|       | et       | Extra Trees Regressor           | 1.9065 | 7.3298   | 2.7073 | 0.8136  | 0.2392 | 0.2079 | 37.832   |
|       | rf       | Random Forest Regressor         | 2.0165 | 7.9122   | 2.8128 | 0.7988  | 0.249  | 0.2221 | 235.223  |
|       | xgboost  | Extreme Gradient Boosting       | 2.7142 | 12.7939  | 3.5768 | 0.6747  | 0.3115 | 0.3031 | 1.389    |
|       | catboost | CatBoost Regressor              | 2.8081 | 13.6734  | 3.6977 | 0.6523  | 0.3194 | 0.3135 | 3.786    |
|       | lightgbm | Light Gradient Boosting Machine | 2.9343 | 14.6817  | 3.8316 | 0.6267  | 0.3303 | 0.3294 | 1.303    |
|       | knn      | K Neighbors Regressor           | 2.9068 | 15.4093  | 3.9254 | 0.6082  | 0.3364 | 0.3222 | 9.02     |
|       | dt       | Decision Tree Regressor         | 2.6828 | 15.4519  | 3.9308 | 0.6071  | 0.3402 | 0.2784 | 14.538   |
|       | gbr      | Gradient Boosting Regressor     | 3.2151 | 17.4789  | 4.1807 | 0.5555  | 0.3528 | 0.3609 | 305.293  |
|       | lr       | Linear Regression               | 3.5761 | 21.9306  | 4.683  | 0.4424  | 0.3806 | 0.3924 | 1.011    |
|       | ridge    | Ridge Regression                | 3.5758 | 21.9286  | 4.6827 | 0.4424  | 0.3807 | 0.3924 | 0.844    |
|       | en       | Elastic Net                     | 3.8366 | 25.5036  | 5.05   | 0.3516  | 0.3972 | 0.4198 | 8.725    |
|       | ada      | AdaBoost Regressor              | 3.9779 | 25.6071  | 5.0553 | 0.3483  | 0.4245 | 0.4867 | 55.947   |
|       | lasso    | Lasso Regression                | 3.85   | 25.7064  | 5.07   | 0.3464  | 0.3991 | 0.4223 | 2.785    |
|       | llar     | Lasso Least Angle Regression    | 3.85   | 25.7057  | 5.07   | 0.3464  | 0.3991 | 0.4223 | 0.748    |
|       | huber    | Huber Regressor                 | 3.826  | 26.2451  | 5.1229 | 0.3327  | 0.396  | 0.4062 | 27.058   |
|       | omp      | Orthogonal Matching Pursuit     | 3.9208 | 26.6611  | 5.163  | 0.3222  | 0.4078 | 0.4322 | 0.768    |
|       | dummy    | Dummy Regressor                 | 4.8249 | 39.3345  | 6.2715 | -0.0001 | 0.4776 | 0.5369 | 0.38     |

| <b>Model</b> | <b>ID</b> | <b>Algorithm</b>             | <b>MAE</b> | <b>MSE</b> | <b>RMSE</b> | <b>R2</b> | <b>RMSLE</b> | <b>MAPE</b> | <b>TT (Sec)</b> |
|--------------|-----------|------------------------------|------------|------------|-------------|-----------|--------------|-------------|-----------------|
|              | par       | Passive Aggressive Regressor | 8.2102     | 103.7467   | 9.5691      | -1.6382   | 0.6415       | 0.903       | 2.384           |

35 Notes: RMSLE is root mean squared logarithmic error, MAPE is mean absolute percentage error, TT (Sec) is model training time, measured in  
36 seconds. Extra Trees Regressor (et) exhibits overfitting; therefore, it was not selected in this study.

37



38 **Table S6.** The hyperparameter range for four ML algorithms.

| Algorithm | Python Package   | Hyperparameter Range                                                                                                                                                                                                                                                                                                                                                                      |
|-----------|------------------|-------------------------------------------------------------------------------------------------------------------------------------------------------------------------------------------------------------------------------------------------------------------------------------------------------------------------------------------------------------------------------------------|
| RF        | sklearn.ensemble | max_depth:[3,30]<br>n_estimators:[ 5000, 8000]<br>max_features:['sqrt', 'log2']<br>min_samples_split:[ 2, 10]<br>min_samples_leaf:[ 2, 10]<br>random_state: 2024                                                                                                                                                                                                                          |
| XGBoost   | xgboost          | max_depth:[3,10]<br>learning_rate: [0.005, 0.01]<br>n_estimators:[2000, 8000]<br>min_child_weight:[1, 300]<br>gamma:(0.0001,1,log=True)<br>reg_alpha: (0.0001,10,log=True)<br>reg_lambda: (0.0001,10,log=True)<br>colsample_bytree:[0.1, 0.8]<br>subsample:[0.6, 0.8]<br>random_state: 2024                                                                                               |
| LightGBM  | lightgbm         | reg_alpha: [0.001, 10.0]<br>reg_lambda: [0.001, 10.0]<br>num_leaves: [11, 333]<br>min_child_samples: [5, 100]<br>max_depth: [3, 20]<br>learning_rate: [0.001,0.005,0.01,0.05,0.1]<br>colsample_bytree: [0.1, 0.5]<br>n_estimators: [7000, 8000]<br>cat_smooth: [10, 100]<br>cat_l2: [1, 20]<br>min_data_per_group: [50, 200]<br>cat_feature: [10, 60]<br>n_jobs: -1<br>random_state: 2024 |
| CatBoost  | catboost         | depth: [3, 10]<br>learning_rate: [0.001,0.005,0.01,0.05,0.1]<br>iterations: [5000, 9000]<br>max_bin: [200, 400]<br>min_data_in_leaf: [1, 30]<br>l2_leaf_reg: [0.0001, 1.0, log=True]<br>subsample: [0.6, 0.9]<br>random_state: 2024                                                                                                                                                       |

**Table S7.** The optimal hyperparameter parameter values for different MLAs.

| <b>Algorithm</b> | <b>Hyperparameter values (<math>h_a</math>)</b>                                                                                                                                                                                                                                                                         | <b>Hyperparameter values (<math>h_w</math>)</b>                                                                                                                                                                                                                                                               |
|------------------|-------------------------------------------------------------------------------------------------------------------------------------------------------------------------------------------------------------------------------------------------------------------------------------------------------------------------|---------------------------------------------------------------------------------------------------------------------------------------------------------------------------------------------------------------------------------------------------------------------------------------------------------------|
| <b>RF</b>        | {'max_depth': 22,<br>'n_estimators': 100,<br>'max_features': 'sqrt',<br>'min_samples_split': 10,<br>'min_samples_leaf': 1}<br>'random_state': 2024}                                                                                                                                                                     | {'max_depth': 16,<br>'n_estimators': 100,<br>'max_features': 'sqrt',<br>'min_samples_split': 10,<br>'min_samples_leaf': 1}<br>'random_state': 2024}                                                                                                                                                           |
| <b>XGBoost</b>   | {'max_depth': 10,<br>'learning_rate': 0.01,<br>'n_estimators': 6265,<br>'min_child_weight': 15,<br>'gamma':<br>0.002099983206704338,<br>'alpha': 0.1497537570416905,<br>'lambda':<br>0.002539897498632027,<br>'colsample_bytree': .676096315<br>705994,<br>'subsample':<br>0.6382245679230509,<br>'random_state': 2024} | {'max_depth': 10,<br>'learning_rate': 0.01,<br>'n_estimators': 6718,<br>'min_child_weight': 4,<br>'gamma': 0.013363217961312412,<br>'alpha': 1.9018751797973954,<br>'lambda': 0.009243058986896945,<br>'colsample_bytree': .57089929712<br>38507,<br>'subsample': 0.769691304776139,<br>'random_state': 2024} |
| <b>LGBM</b>      | {'reg_alpha':<br>2.2098573262841947,<br>'reg_lambda':<br>4.777845816164959,<br>'num_leaves': 312,<br>'min_child_samples': 5,<br>'max_depth': 17,<br>'learning_rate': 0.1,<br>'colsample_bytree': .479017479<br>3827581,<br>'n_estimators': 7042,                                                                        | {'reg_alpha':<br>1.9287086325195282,<br>'reg_lambda':<br>5.462281985773448,<br>'num_leaves': 298,<br>'min_child_samples': 5,<br>'max_depth': 19,<br>'learning_rate': 0.05,<br>'colsample_bytree': .46719452997<br>75325,<br>'n_estimators': 7759,                                                             |

| Algorithm             | Hyperparameter values ( $h_a$ ) | Hyperparameter values ( $h_w$ ) |
|-----------------------|---------------------------------|---------------------------------|
| <b>CatBoost</b>       | 'cat_smooth': 61,               | 'cat_smooth': 14,               |
|                       | 'cat_l2': 17,                   | 'cat_l2': 16,                   |
|                       | 'min_data_per_group': 117,      | 'min_data_per_group': 122,      |
|                       | 'cat_feature': 13,              | 'cat_feature': 20               |
|                       | 'random_state': 2024}           | 'random_state': 2024}           |
|                       | {'depth': 10,                   | {'depth': 10,                   |
|                       | 'learning_rate': 0.05,          | 'learning_rate': 0.05,          |
|                       | 'iterations': 7556,             | 'iterations': 7936,             |
|                       | 'max_bin': 366,                 | 'max_bin': 366,                 |
|                       | 'min_data_in_leaf': 14,         | 'min_data_in_leaf': 12,         |
|                       | 'l2_leaf_reg':                  | 'l2_leaf_reg':                  |
|                       | 0.004530685052947802,           | 0.048609449544924604,           |
|                       | 'subsample':                    | 'subsample':                    |
|                       | 0.6243190198912542,             | 0.6316663275897422              |
| 'random_state': 2024} | 'random_state': 2024}           |                                 |

42 **Table S8.** The training results of different MLAs

| Model | Algorithm | Train  |        |        |        |          | Test   |         |        |        |
|-------|-----------|--------|--------|--------|--------|----------|--------|---------|--------|--------|
|       |           | R2     | MSE    | RMSE   | MAE    | Times(s) | R2     | MSE     | RMSE   | MAE    |
| $h_a$ | RF        | 0.9107 | 3.2902 | 1.8139 | 1.3638 | 126.52   | 0.8138 | 6.8901  | 2.6249 | 1.9405 |
|       | XGBoost   | 0.8670 | 4.8885 | 2.2110 | 1.6840 | 78.23    | 0.8000 | 7.4147  | 2.7230 | 2.0220 |
|       | LGBM      | 0.9860 | 0.5170 | 0.7190 | 0.5320 | 42.37    | 0.8210 | 6.6255  | 2.5740 | 1.8580 |
|       | CatBoost  | 0.8800 | 4.4310 | 2.1050 | 1.6110 | 427.16   | 0.8010 | 7.3495  | 2.7110 | 2.0120 |
| $h_w$ | RF        | 0.7696 | 9.0625 | 3.0104 | 2.3070 | 98.40    | 0.7169 | 11.1984 | 3.3464 | 2.5307 |
|       | XGBoost   | 0.8770 | 4.8180 | 2.1950 | 1.6780 | 98.03    | 0.7750 | 8.9162  | 2.9860 | 2.2060 |
|       | LGBM      | 0.9560 | 1.7424 | 1.3200 | 0.9790 | 96.71    | 0.7890 | 8.3405  | 2.8880 | 2.0940 |
|       | CatBoost  | 0.8590 | 5.5413 | 2.3540 | 1.7970 | 672.64   | 0.7670 | 9.2112  | 3.0350 | 2.2510 |

43 Notes:  $h_a$  is arithmetic mean height;  $h_w$  is weighted mean height

44 **Table S9.** The fitting results of ML-based mixed-effects models

| Model | Equation                                    | Npar | AIC     | BIC     | logLik  | Chisq  | Df | Pr(>Chisq) | Signif. codes |
|-------|---------------------------------------------|------|---------|---------|---------|--------|----|------------|---------------|
| $h_a$ | $h_a \sim fixed\_h_a + (1   zone)$          | 4    | 962124  | 962165  | -481058 |        |    |            |               |
|       | $h_a \sim fixed\_h_a + (fixed\_h_a   zone)$ | 6    | 962107  | 962168  | -481048 | 20.594 | 2  | 3.370E-05  | ***           |
| $h_w$ | $h_w \sim fixed\_h_w + (1   zone)$          | 4    | 1008669 | 1008710 | -504331 |        |    |            |               |
|       | $h_w \sim fixed\_h_w + (fixed\_h_a   zone)$ | 6    | 1008650 | 1008711 | -504319 | 23.173 | 2  | 9.293E-06  | ***           |

45 Notes:  $h_a$  is arithmetic mean height, corresponding to the response variable in the mixed model structure;  $h_w$  is weighted mean height ,  
 46 corresponding to the response variable in the mixed model structure;  $fixed\_h_a$  represents the predicted values of arithmetic mean height in  
 47 machine learning, corresponding to the covariate in the mixed model structure;  $fixed\_h_w$  represents the predicted values of weighted mean  
 48 height in machine learning, corresponding to the covariate in the mixed model structure; (1 | zone) indicates fitting random intercepts at the level  
 49 of the grouping variable " zone "; (x | zone) indicates fitting a random slope related to the covariate at each level of the grouping variable " zone  
 50 "; Signif. codes: 0 '\*\*\*' 0.001 '\*\*' 0.01 '\*' 0.05 '.' 0.1 ' ' 1

51

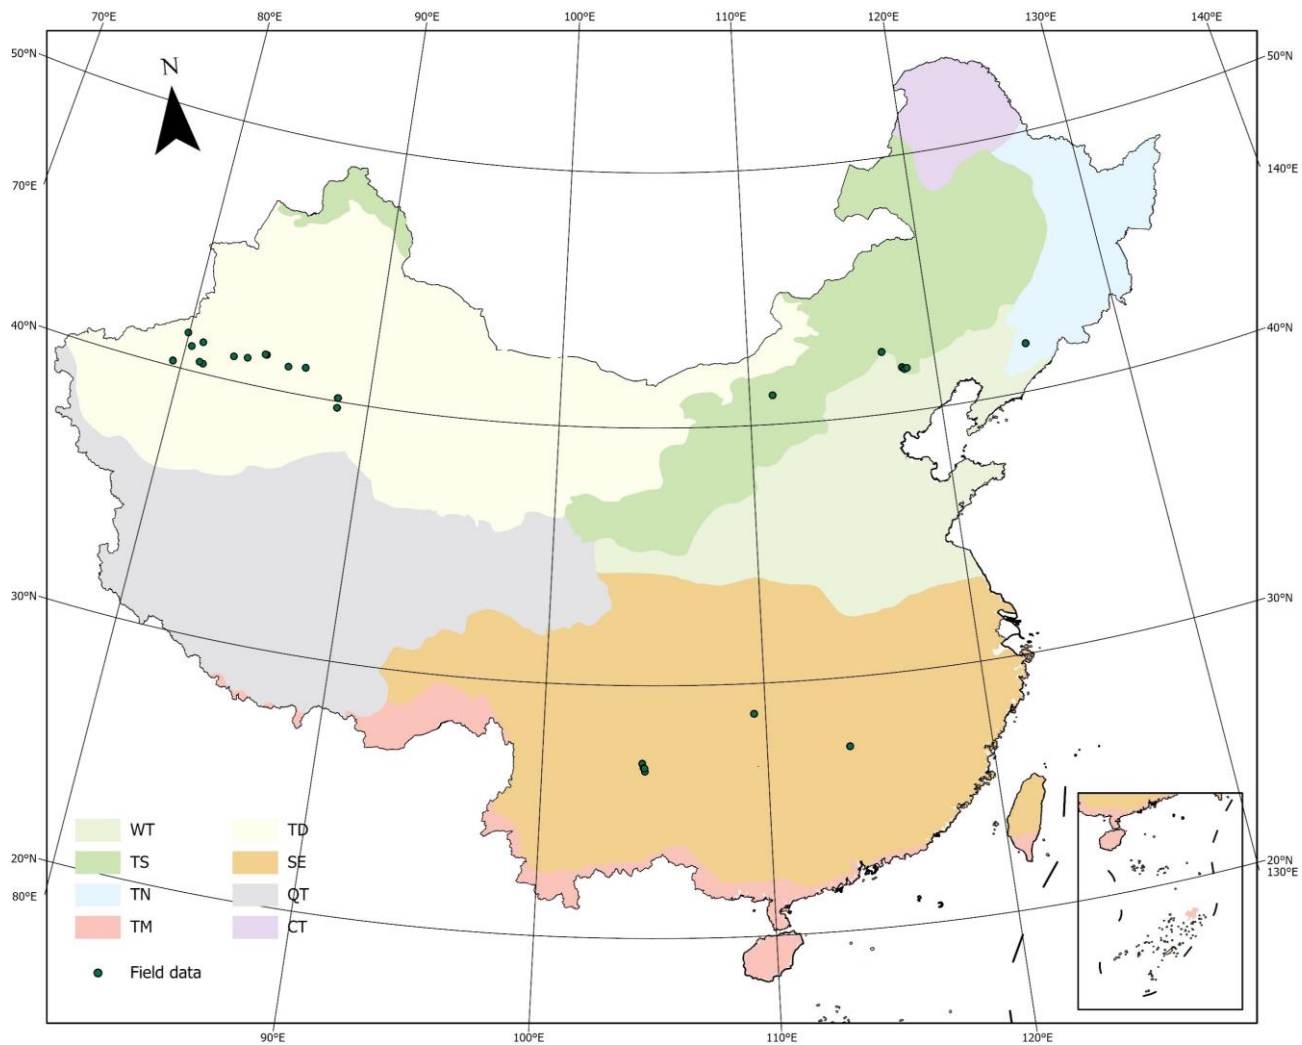

**Figure S1.** Field samples collected for weighted mean height calculation and product validation. Publisher's remark: please note that the above figure contains disputed territories.

## Note S1

The relative uncertainty for each pixel is calculated using Eq (1)

$$\varepsilon_i = \frac{RMSE}{\hat{y}_i} * 100\% \quad (1)$$

where  $RMSE$  is the root mean squared error of validation set,  $\hat{y}_i$  represents the predicted value of  $i^{th}$  observed value.

60 The mean of relative uncertainty for all pixels is calculated using Eq (2)

$$\begin{aligned} \bar{\varepsilon} &= \frac{\sum_{i=1}^N \frac{RMSE}{\hat{y}_i}}{N} \times 100\% \quad (2) \\ &= RMSE \frac{\sum_{i=1}^N \frac{1}{\hat{y}_i}}{N} \times 100\% \end{aligned}$$

We know that the harmonic mean is less than or equal to the arithmetic mean, which is expressed as Eq (3), then mathematically Eq (2) is expressed as Eq (4):

$$\frac{N}{\sum_{i=1}^N \frac{1}{\hat{y}_i}} \leq \frac{\sum_{i=1}^N \hat{y}_i}{N} = \bar{y} \quad (3)$$

$$\begin{aligned} \bar{\varepsilon} &= \frac{\sum_{i=1}^N \frac{RMSE}{\hat{y}_i}}{N} \times 100\% = RMSE \frac{\sum_{i=1}^N \frac{1}{\hat{y}_i}}{N} \times 100\% \quad (4) \\ &\leq \frac{RMSE}{\bar{y}} \times 100\% \end{aligned}$$

So, the maximum of mean  $\varepsilon_{product}$  is calculated by Eq (5)

$$\bar{\varepsilon}_{max} = \frac{RMSE}{\bar{y}} \times 100\% \quad (5)$$

65 **Note S2**

In response, we have explored the issue from both theoretical and empirical perspectives to provide a comprehensive answer.

(1) Theoretical Analysis

Given a set of tree height data  $h_1, h_2, \dots, h_n$  in a plot, and the corresponding diameter at breast height  
 70 data  $d_1, d_2, \dots, d_n$ . Based on the mathematical formulas for  $h_w$  and  $h_L$ , the following conclusions can be derived.

$$\begin{aligned} \text{if } d_i < h_i, \text{ then } h_w < h_L \\ \text{if } d_i \geq h_i, \text{ then } h_w \geq h_L \end{aligned} \quad (6)$$

Here is the detailed mathematical proof:

To prove whether the difference between the weighted average heights  $h_w$  and  $h_L$ , where the weights are  $w_a = h^2$  and  $w_b = d^2$ , is greater than or less than zero, we will define and expand the formulas for  
 75 both weighted averages.

When the diameter at breast height (DBH)  $d_i$  is greater than the tree height  $h_i$ ,  $w_b = d^2 = (h + r)^2$  (with  $r \geq 0$ )

**Step1: Define the Weighted Average Heights**

Given a set of tree height data  $h_1, h_2, \dots, h_n$ , we compute the weighted average heights using weights  
 80  $w_a$  and  $w_b$  as follows:

Weighted average height  $h_w$  using weights  $w_a = h^2$ :

$$h_w = \frac{\sum_{i=1}^n h_i * h_i^2}{\sum_{i=1}^n h_i^2} = \frac{\sum_{i=1}^n h_i^3}{\sum_{i=1}^n h_i^2} \quad (7)$$

Weighted average height  $h_L$  using weights  $w_b = (h + r)^2$ :

$$h_L = \frac{\sum_{i=1}^n h_i * (h_i + r)^2}{\sum_{i=1}^n (h_i + r)^2} \quad (8)$$

Expand  $w_b = (h + r)^2$ :

$$w_b = (h + r)^2 = h^2 + 2hr + r^2 \quad (9)$$

Thus, the weighted average height  $h_L$  can be written as:



$$h_L = \frac{\sum_{i=1}^n h_i * (h_i^2 + 2h_i r + r^2)}{\sum_{i=1}^n (h_i^2 + 2h_i r + r^2)} = \frac{\sum_{i=1}^n (h_i^3 + 2h_i^2 r + r^2 h_i)}{\sum_{i=1}^n (h_i^2 + 2h_i r + r^2)} \quad (10)$$

85 **Step2: Analyze the Difference** ( $h_w - h_L$ )

We aim to analyze and determine the sign of the difference:

$$\Delta h = h_w - h_L \quad (11)$$

Substitute the formulas for  $h_w$  and  $h_L$ :

$$\Delta h = \frac{\sum_{i=1}^n h_i^3}{\sum_{i=1}^n h_i^2} - \frac{\sum_{i=1}^n (h_i^3 + 2h_i^2 r + r^2 h_i)}{\sum_{i=1}^n (h_i^2 + 2h_i r + r^2)} \quad (12)$$

Combine the two fractions into a single expression:

$$\Delta h = \frac{(\sum_{i=1}^n h_i^3)(\sum_{i=1}^n (h_i^2 + 2h_i r + r^2)) - (\sum_{i=1}^n (h_i^3 + 2h_i^2 r + r^2 h_i))(\sum_{i=1}^n h_i^2)}{\sum_{i=1}^n h_i^2 (\sum_{i=1}^n (h_i^2 + 2h_i r + r^2))} \quad (13)$$

**Step3: Expand and Simplify the Numerator**

90 Expand the numerator:

$$\text{Numerator} = (\sum_{i=1}^n h_i^3)(\sum_{i=1}^n (h_i^2 + 2h_i r + r^2)) - (\sum_{i=1}^n (h_i^3 + 2h_i^2 r + r^2 h_i))(\sum_{i=1}^n h_i^2) \quad (14)$$

Further expand and simplify, eliminating the common terms: (15)

$$= 2r(\sum_{i=1}^n h_i^3 \sum_{i=1}^n h_i - \sum_{i=1}^n h_i^2 \sum_{i=1}^n h_i^2) + r^2(\sum_{i=1}^n h_i^3 - \sum_{i=1}^n h_i \sum_{i=1}^n h_i^2)$$

**Step4: Determine the Sign**

To determine the sign of  $\Delta h$ , consider the two parts:

First part:

$$2r(\sum_{i=1}^n h_i^3 \sum_{i=1}^n h_i - \sum_{i=1}^n h_i^2 \sum_{i=1}^n h_i^2) \quad (16)$$

Since  $r \geq 0$ , we need to analyze the sign of the term inside the parentheses. By applying the Cauchy-

95 Schwarz inequality:

$$\sum_{i=1}^n h_i^2 \sum_{i=1}^n h_i^4 \geq (\sum_{i=1}^n h_i^3)^2 \quad (17)$$

Thus:

$$\sum_{i=1}^n h_i^3 \sum_{i=1}^n h_i \geq \sum_{i=1}^n h_i^2 \sum_{i=1}^n h_i^2 \quad (18)$$

So, the first part is non-negative.

Second part:

$$r^2(\sum_{i=1}^n h_i^3 - \sum_{i=1}^n h_i \sum_{i=1}^n h_i^2) \quad (19)$$

Similarly, applying the Cauchy-Schwarz inequality:

$$\sum_{i=1}^n h_i^3 \leq \sqrt{(\sum_{i=1}^n h_i^2)(\sum_{i=1}^n h_i^4)} \quad (20)$$

100 In general, for specific cases or for non-negative sequences, the original inequality:

$$\sum_{i=1}^n h_i^3 \geq \sum_{i=1}^n h_i \sum_{i=1}^n h_i^2 \quad (21)$$

can be demonstrated to hold using known inequalities or specific examples. The inequality can often hold true in practice or under specific conditions, but may not always be true in every case without additional constraints or conditions.

So, the second part is also non-negative.

105 **Step5: Conclusion**

Since the numerator is the sum of two terms, each of which is non-negative, and at least one of them is strictly positive (because  $r \geq 0$ ), it follows that  $\Delta h = h_w - h_L \geq 0$ . Particularly, when the values  $h_i$  are not all equal, the difference is strictly greater than 0. The weighted average height  $h_w \geq h_L$ . Further, the weight  $w_b = (h + r)^2$ , which includes a positive linear term  $2hr$  and a constant term  $r^2$ , resulting in  
 110 higher weights for each  $h_i$  when calculating the weighted average. Consequently, as  $h_i$  increases, the difference between  $h_w$  and  $h_L$  also grows.

(2) Empirical Data Analysis

We validated our theoretical findings with empirical data. Our validation dataset, which includes measurements where DBH often exceeds tree height (Figure S1), supports the conclusion that  $h_w$

115  $\geq h_L$ .

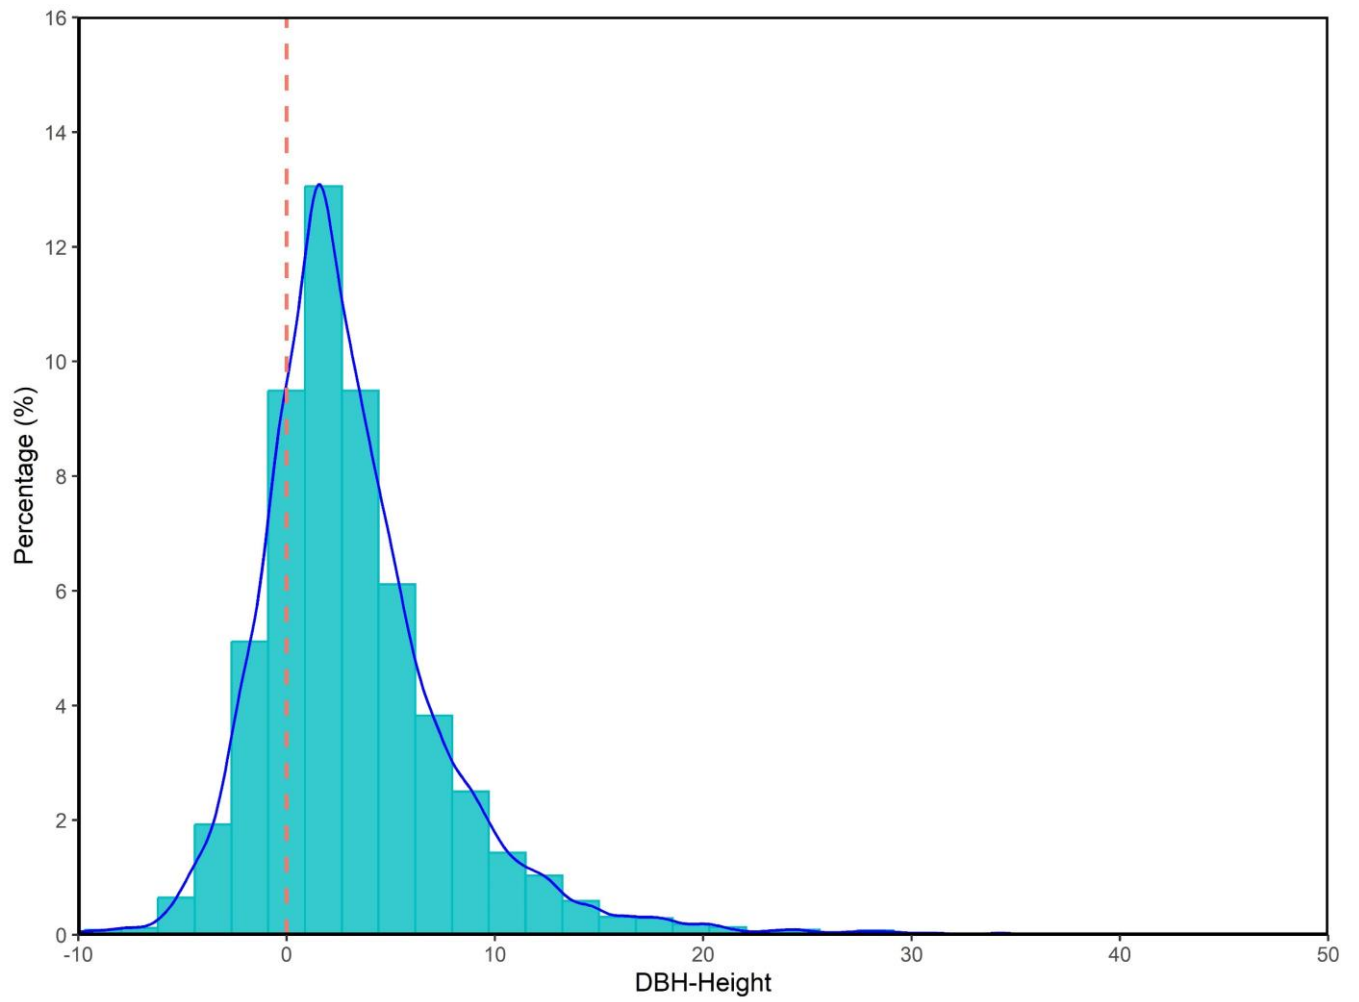

**Figure S2.** Frequency distribution of (DBH - Height) for tree measurement data in each plot
